# Supplementary material for: Ginsenoside Rh1 Induces MCF-7 Cell Apoptosis and Autophagic Cell Death through ROS-Mediated Akt Signaling
Source: MDPI journal article supplement (doi:10.3390/cancers13081892), 2021-04-15

Whole blot supplementary materials

Figure 2

**A**

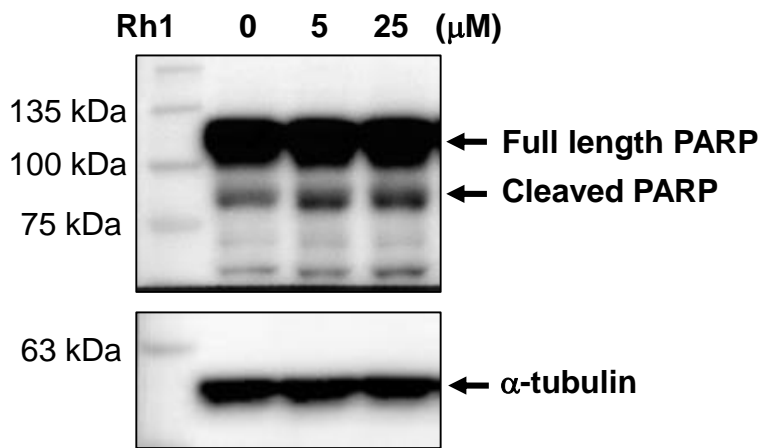

**E**

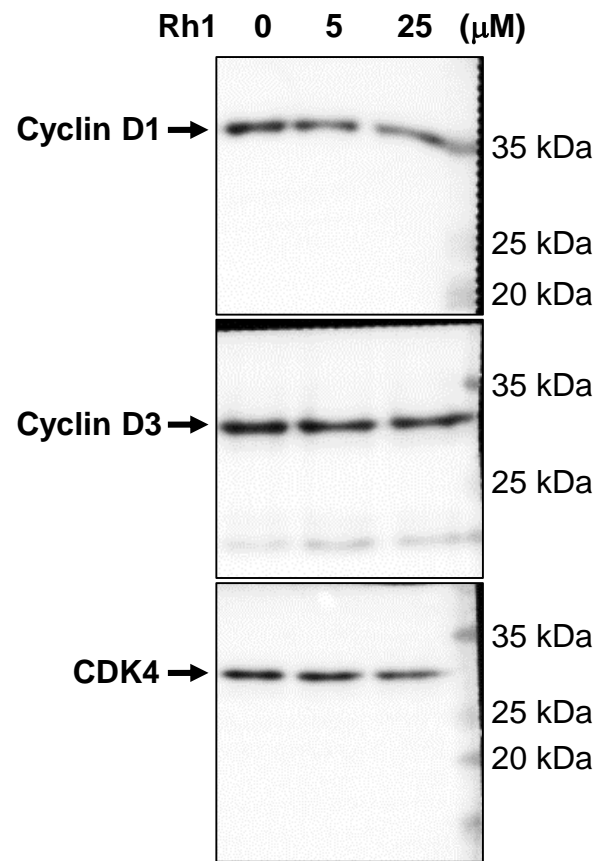

**F**

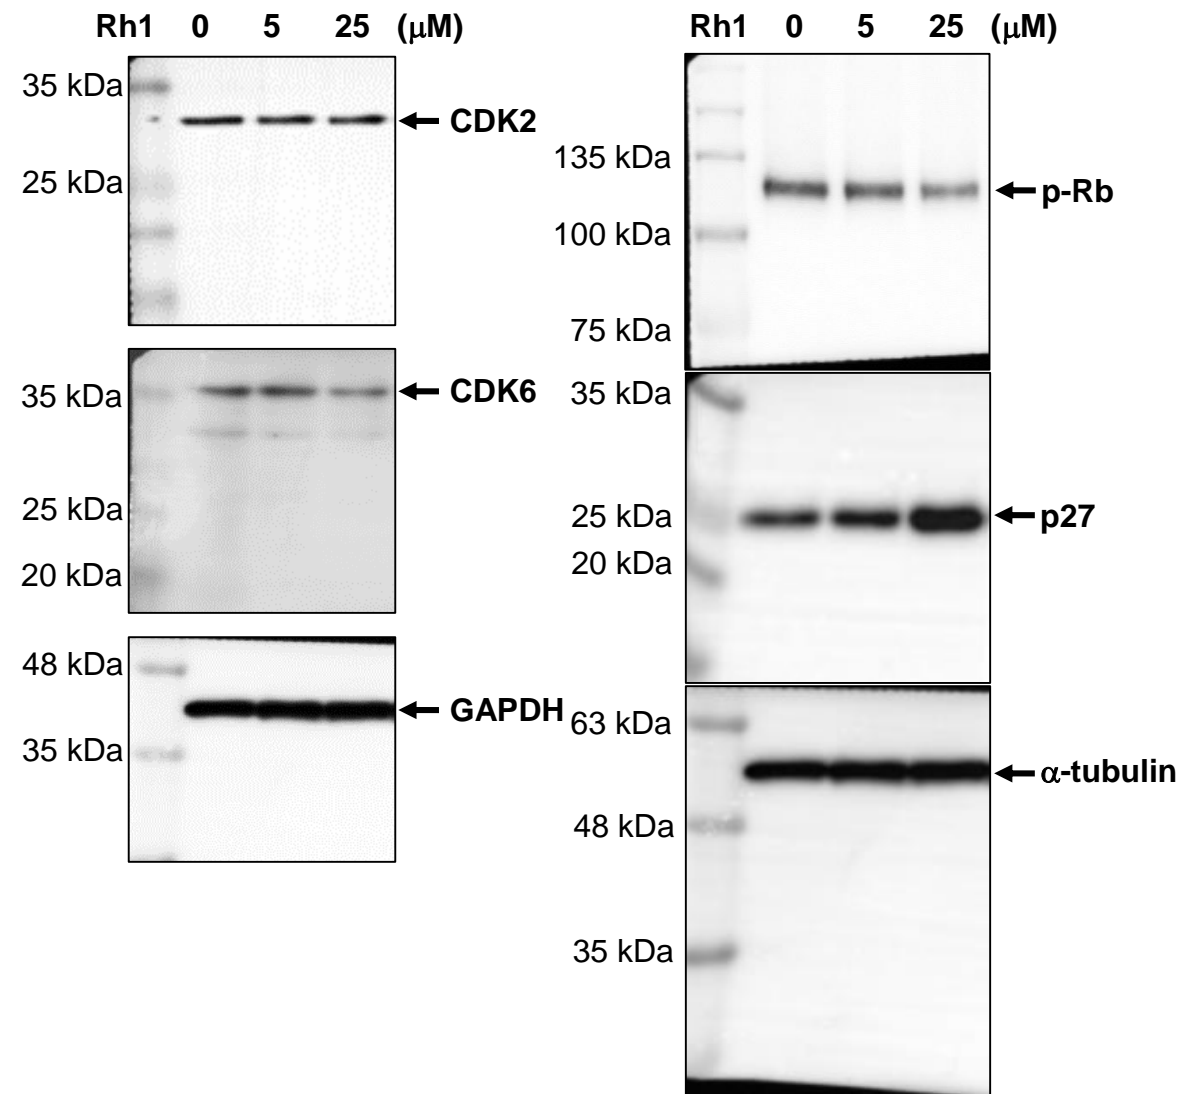

Figure 3

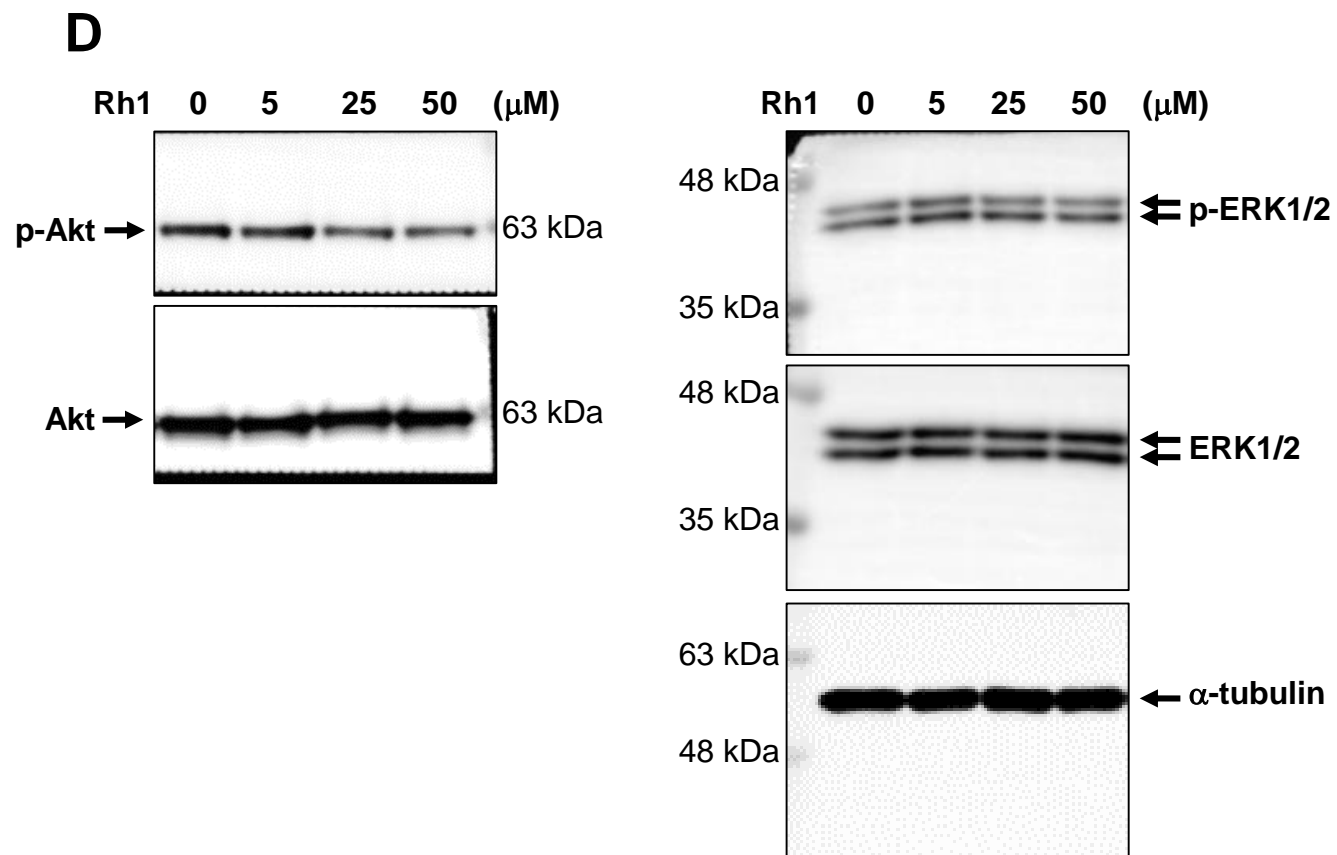

Figure 3

F

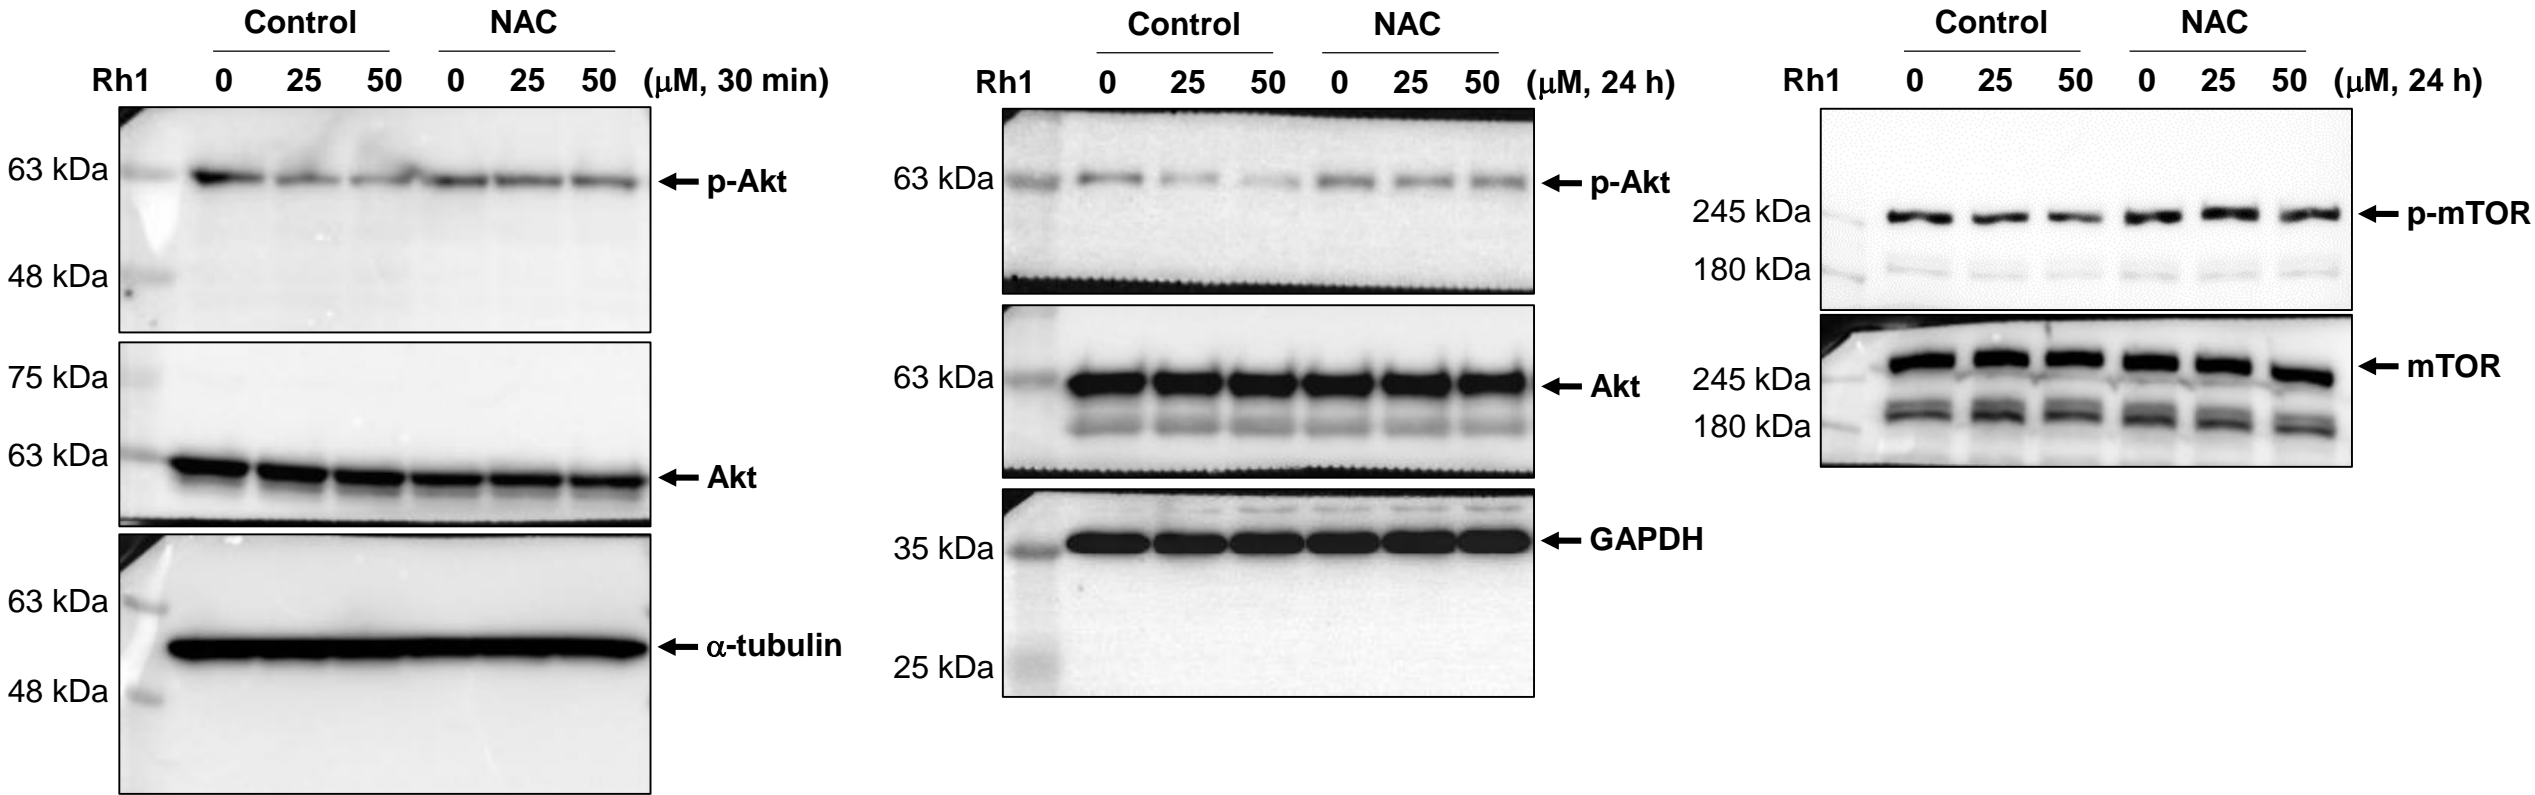

Figure 3

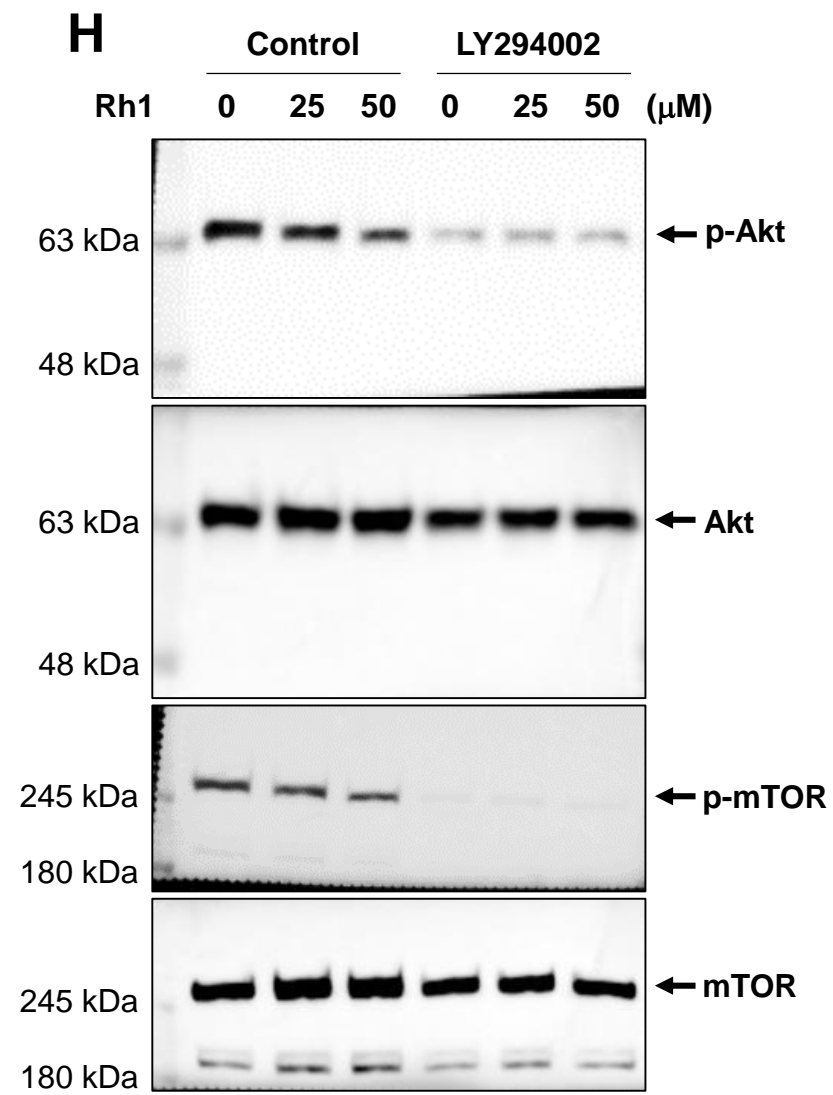

## Figure 4

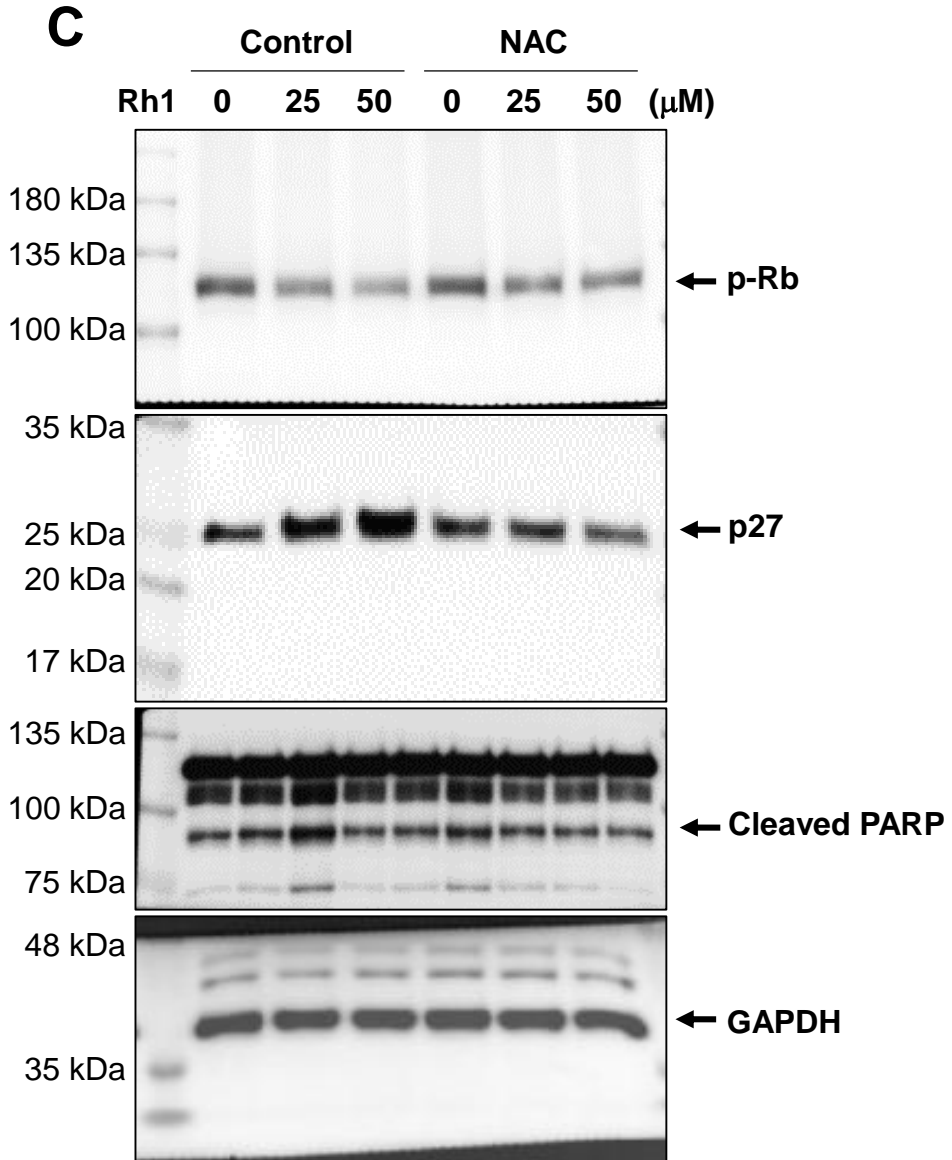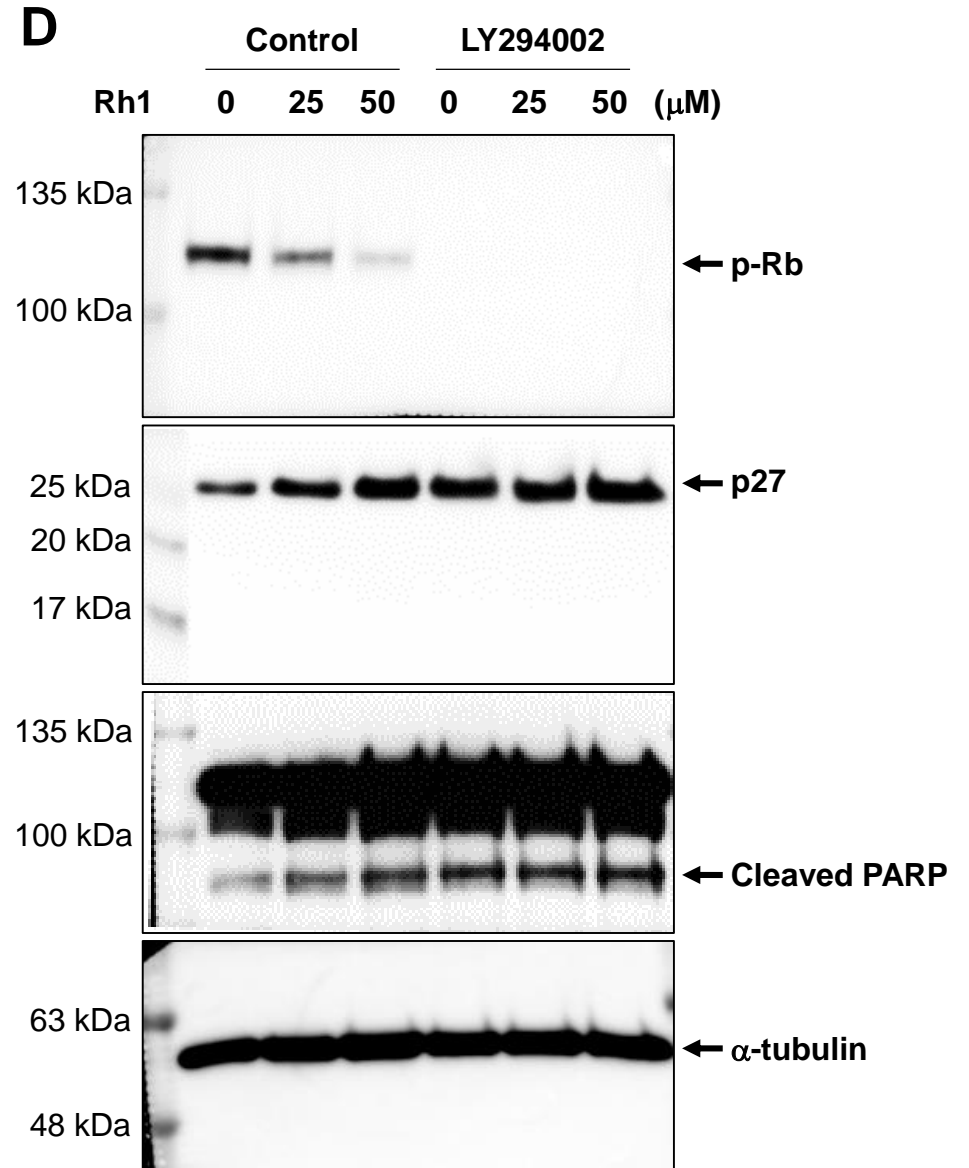

**Figure 5**

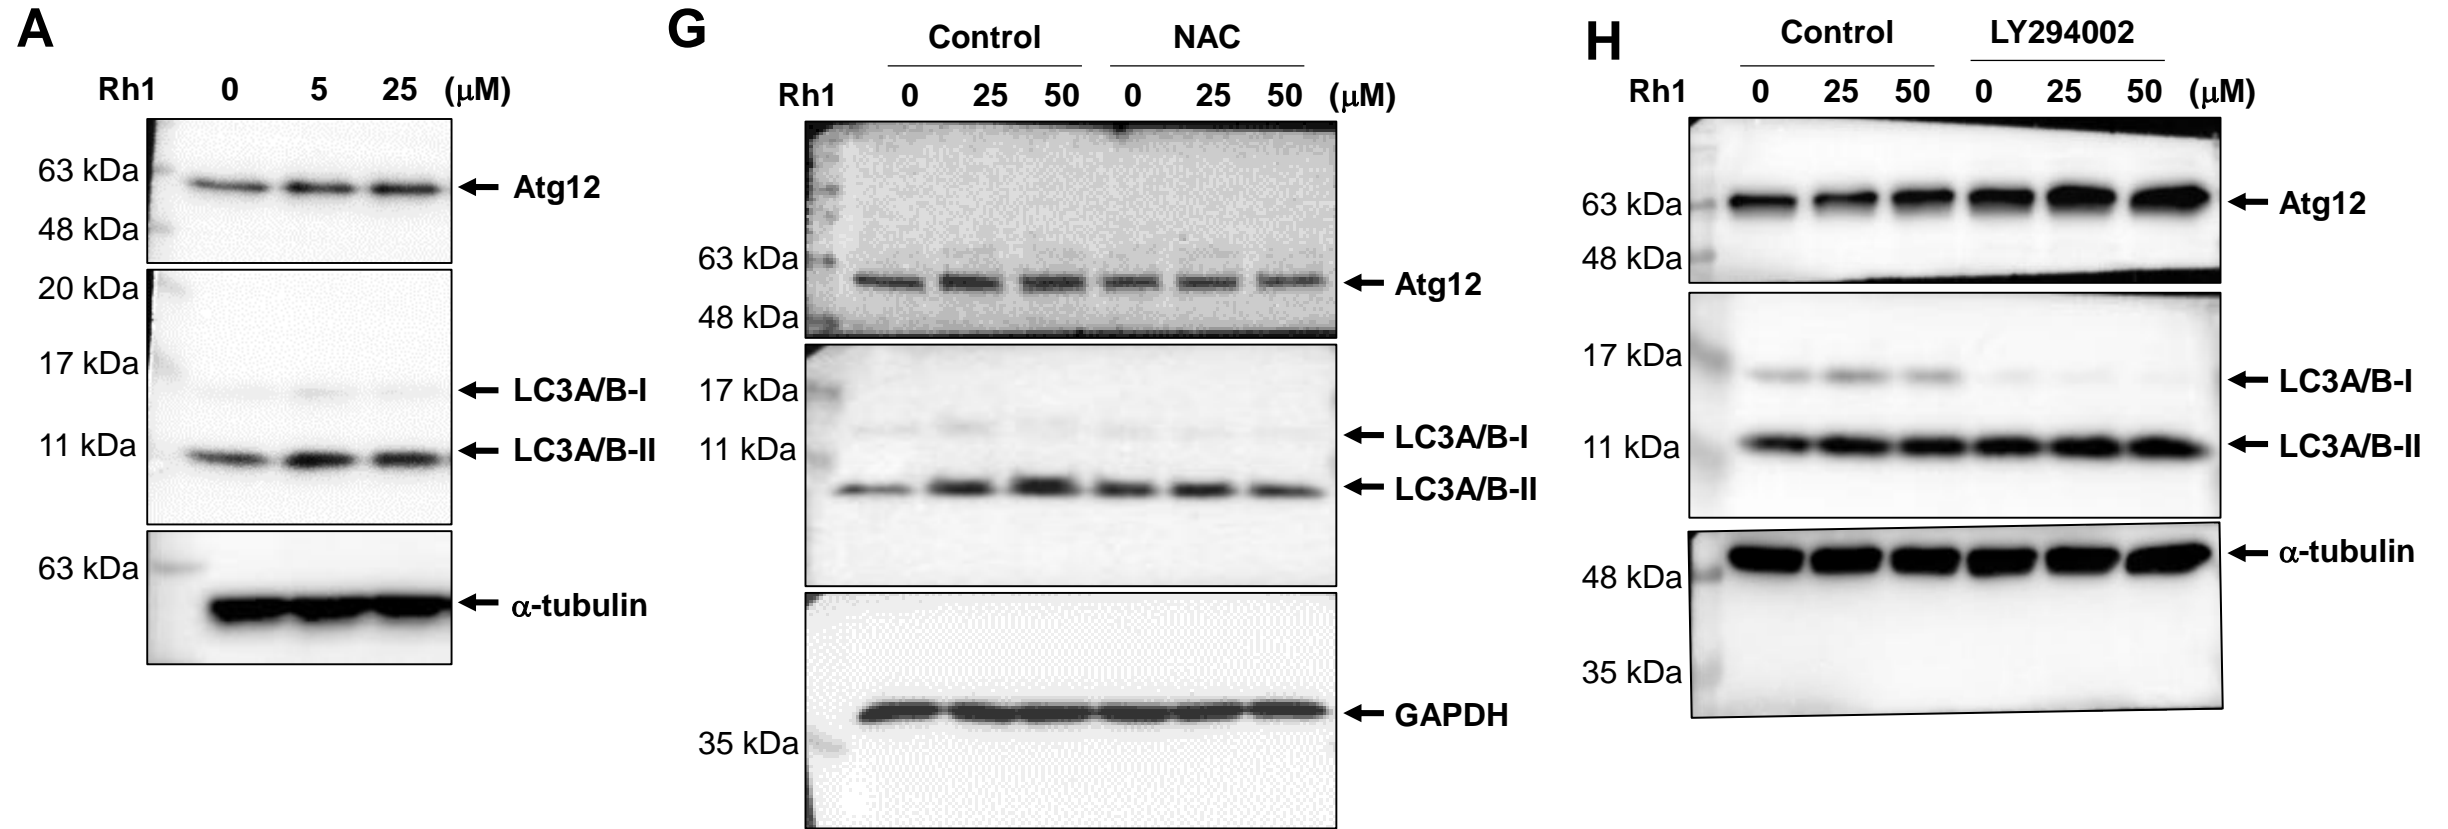

Figure 6

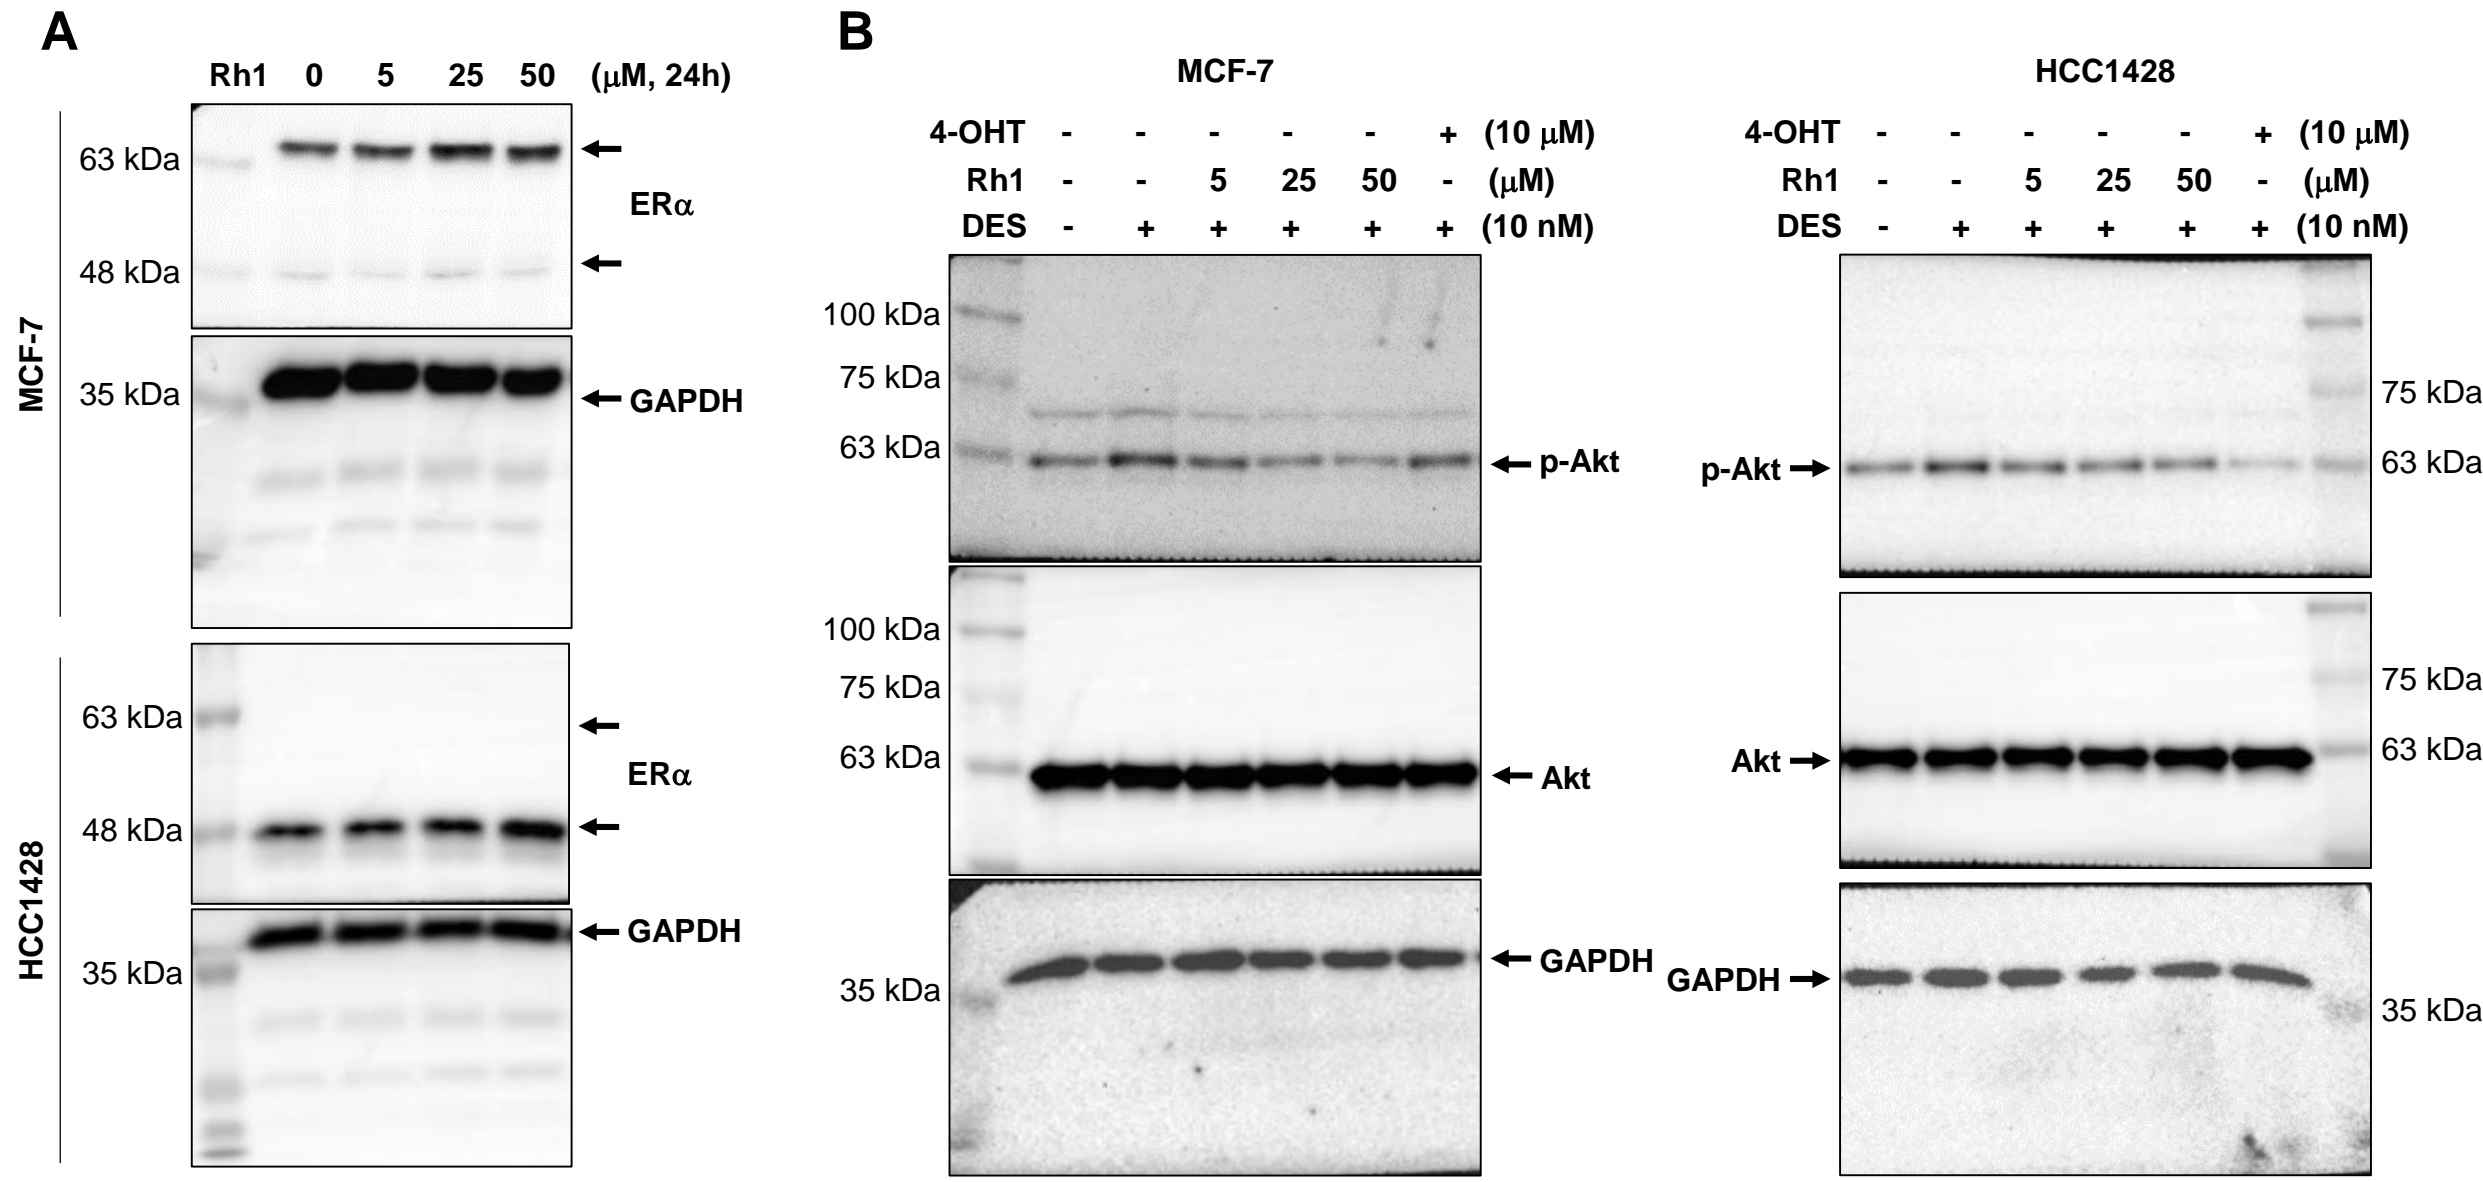



Figure 6

F

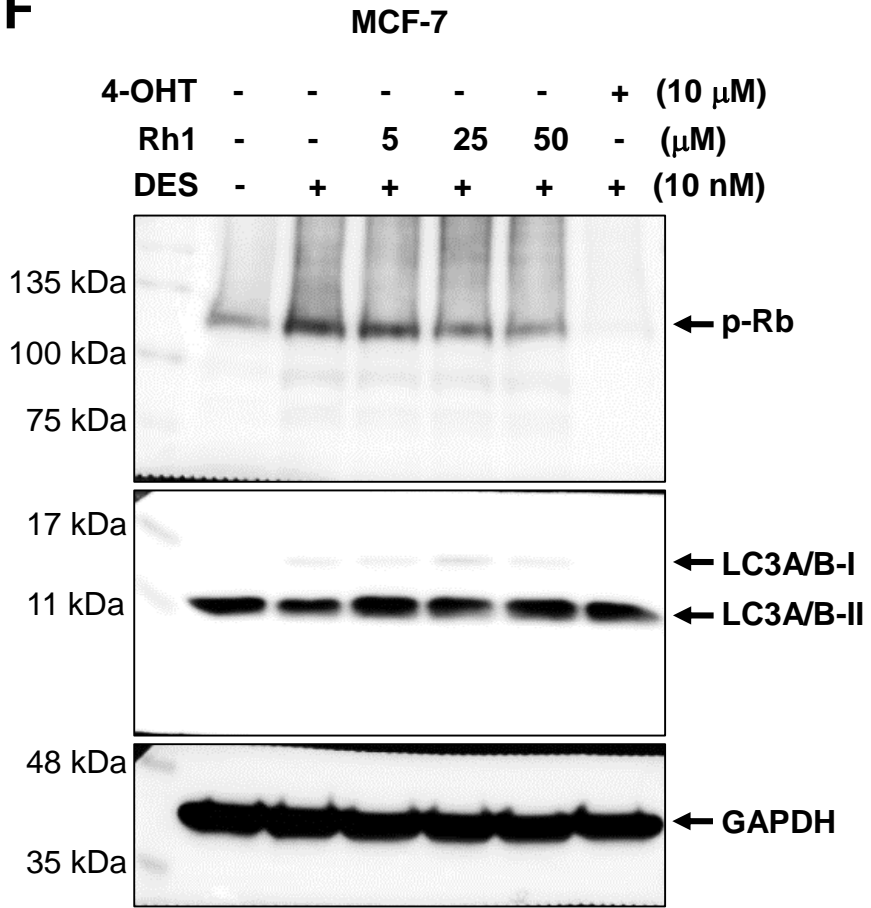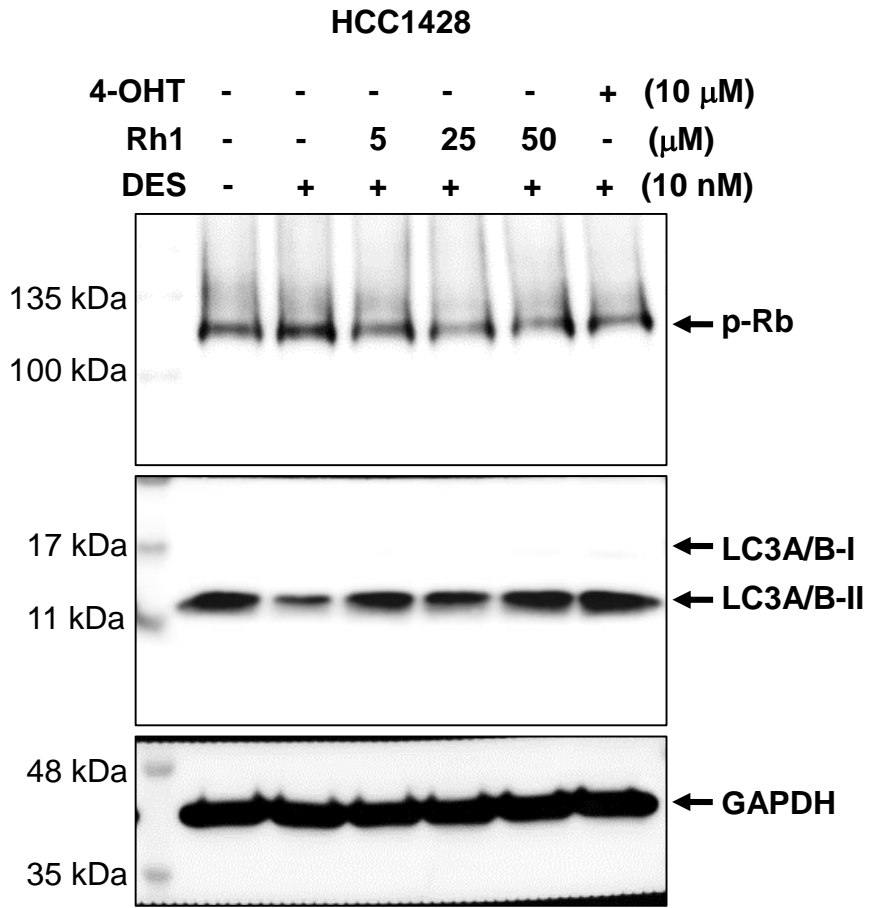

**Figure S1**

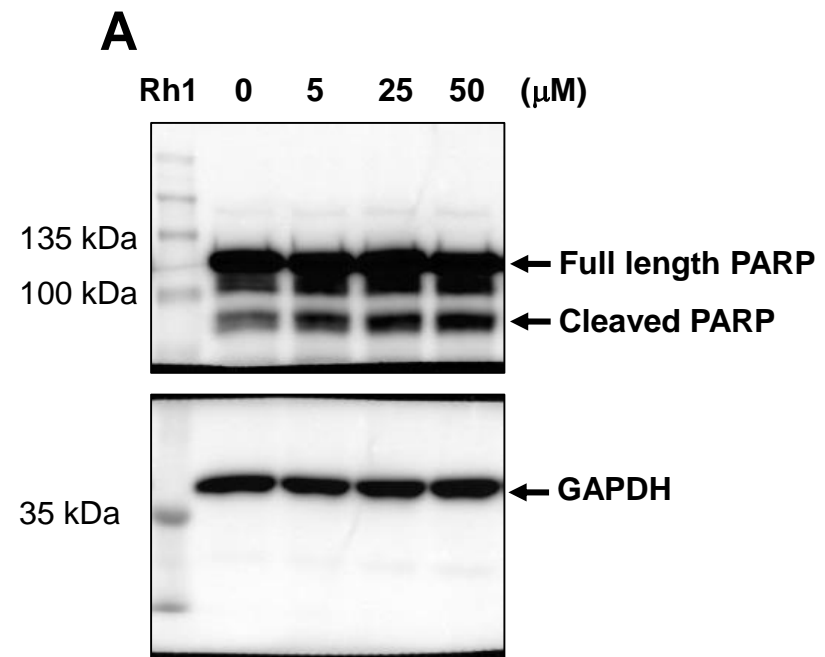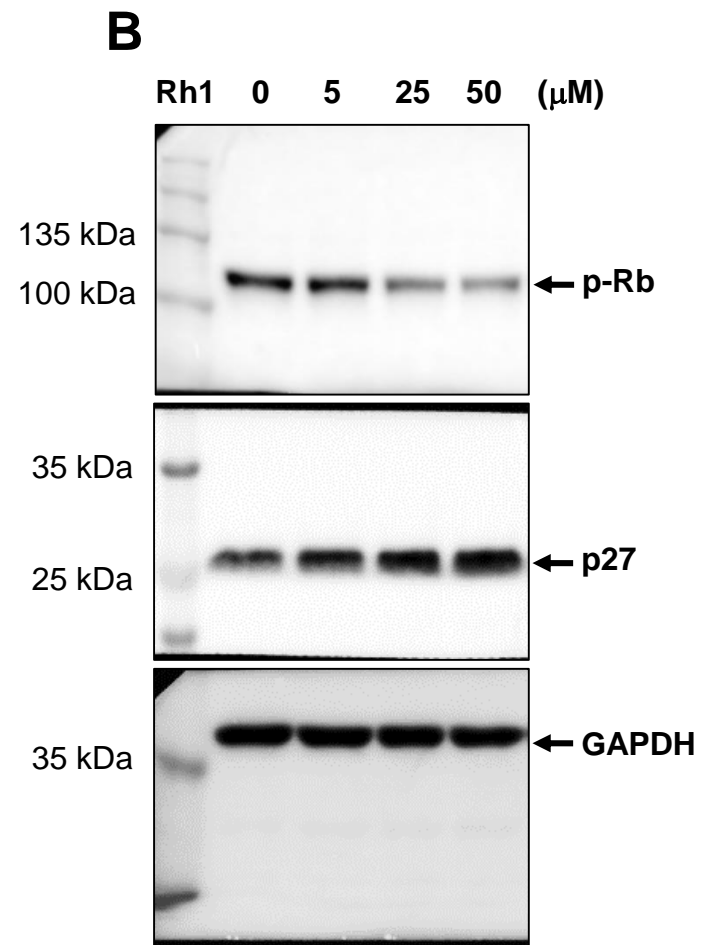

**Figure S2**

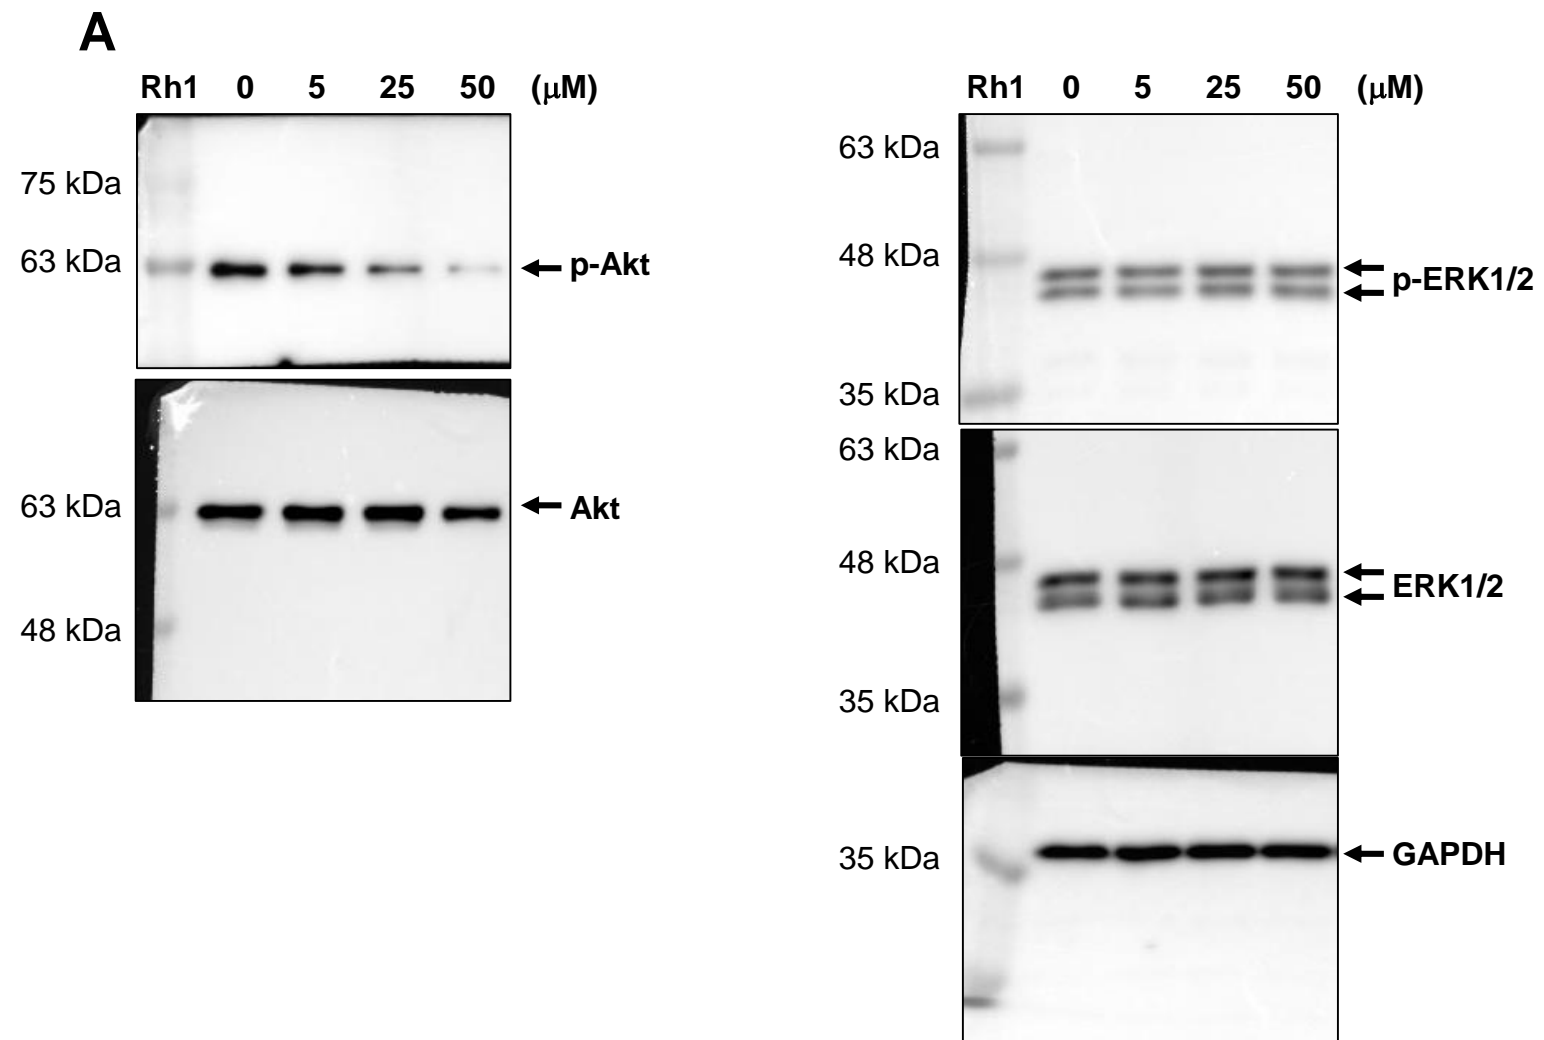

Supplement: s1 [file s1]
